# Supplementary material
Source: MDPI journal article supplement (https://www.mdpi.com/2073-4395/11/7/1418)
Supplement: s1 [file s1]

# Organic Oat Response to Variety, Seeding Rate, and Nutrient Source and Rate

## Supplementary Files

Melissa L. Wilson <sup>1</sup>, Emily E. Evans <sup>2</sup>, Lee Klossner <sup>2</sup> and Paulo H. Pagliari <sup>2,\*</sup>

<sup>1</sup> Department of Soil, Water, and Climate, University of Minnesota, 1991 Upper Buford Circle, Saint Paul, MN 55108, USA; mlw@umn.edu

<sup>2</sup> Department of Soil, Water, and Climate, University of Minnesota, 23669 130th Street, Lamberton, MN 56152, USA; saege002@umn.edu (E.E.E.); kloss001@umn.edu (L.K.)

\* Correspondence: pagli005@umn.edu

**Table S1.** A summary of  $P > F$  values for main effects and interactions for grain yield, plant population, number of tillers, grain nutrient content, and post-harvest soil (0 to 15 cm) nutrient contents for the organic oat trial conducted near Lamberton, MN in 2015 and 2016. Factors include three oat maturity groups in each year, two nutrient sources (beef manure or composted beef manure), three nitrogen (N) application rates and a no-N control, and two seeding rates. Main effects or interactions were considered significant at  $p \leq 0.05$ .

| Main Effects and Interactions | Yield  | Plant Population | Number of Tillers | Grain Nutrient Content |       |       |        |       |       | Post-Harvest Soil |          |       |
|-------------------------------|--------|------------------|-------------------|------------------------|-------|-------|--------|-------|-------|-------------------|----------|-------|
|                               |        |                  |                   | N                      | P     | K     | Ca     | Mg    | S     | NO <sub>3</sub>   | Bray P-1 | K     |
| Categorical variables         |        |                  |                   |                        |       |       |        |       |       |                   |          |       |
| Maturity group (maturity)     | <0.001 | <0.001           | 0.139             | 0.042                  | 0.842 | 0.013 | <0.001 | 0.032 | 0.001 | 0.056             | 0.587    | 0.215 |
| Seeding rate (seed)           | 0.582  | <0.001           | 0.490             | 0.831                  | 0.441 | 0.148 | 0.874  | 0.789 | 0.741 | 0.740             | 0.594    | 0.760 |
| Nutrient source (source)      | 0.950  | 0.997            | 0.744             | 0.749                  | 0.597 | 0.584 | 0.494  | 0.709 | 0.821 | 0.633             | 0.779    | 0.973 |
| Maturity × seed               | 0.237  | 0.492            | 0.214             | 0.776                  | 0.129 | 0.304 | 0.507  | 0.420 | 0.338 | 0.054             | 0.835    | 0.098 |
| Maturity × source             | 0.987  | 0.991            | 0.969             | 0.987                  | 0.977 | 0.990 | 0.962  | 0.996 | 0.893 | 0.947             | 0.984    | 0.951 |
| Seed × source                 | 0.860  | 0.967            | 0.589             | 0.887                  | 0.804 | 0.814 | 0.820  | 0.963 | 0.842 | 0.703             | 0.962    | 0.906 |
| Maturity × seed × source      | 0.989  | 0.992            | 0.993             | 0.996                  | 0.991 | 0.996 | 0.997  | 0.987 | 0.996 | 0.974             | 0.978    | 0.994 |
| Regression                    |        |                  |                   |                        |       |       |        |       |       |                   |          |       |
| Linear response               |        |                  |                   |                        |       |       |        |       |       |                   |          |       |
| Nitrogen rate (N)             | <0.001 | 0.835            | 0.009             | 0.732                  | 0.880 | 0.749 | 0.019  | 0.158 | 0.508 | 0.293             | <0.0001  | 0.051 |
| N × maturity                  | 0.484  | 0.722            | 0.086             | 0.529                  | 0.628 | 0.940 | 0.159  | 0.826 | 0.758 | 0.493             | 0.674    | 0.155 |
| N × seed                      | 0.649  | 0.231            | 0.416             | 0.864                  | 0.274 | 0.499 | 0.089  | 0.211 | 0.311 | 0.555             | 0.928    | 0.283 |
| N × source                    | 0.320  | 0.706            | 0.333             | 0.050                  | 0.760 | 0.700 | 0.854  | 0.642 | 0.440 | 0.029             | 0.165    | 0.147 |
| N × maturity × seed           | 0.209  | 0.422            | 0.780             | 0.645                  | 0.324 | 0.746 | 0.231  | 0.722 | 0.171 | 0.009             | 0.679    | 0.178 |
| N × maturity × source         | 0.974  | 0.949            | 0.742             | 0.858                  | 0.775 | 0.134 | 0.434  | 0.738 | 0.438 | 0.672             | 0.987    | 0.908 |
| N × seed × source             | 0.613  | 0.892            | 0.622             | 0.665                  | 0.656 | 0.566 | 0.487  | 0.813 | 0.677 | 0.651             | 0.771    | 0.302 |
| N × maturity × seed × source  | 0.678  | 0.977            | 0.872             | 0.777                  | 0.839 | 0.956 | 0.644  | 0.792 | 0.700 | 0.934             | 0.918    | 0.930 |
| Quadratic response            |        |                  |                   |                        |       |       |        |       |       |                   |          |       |
| N                             | <0.001 | 0.719            | 0.207             | 0.549                  | 0.998 | 0.699 | 0.013  | 0.235 | 0.498 | 0.176             | 0.027    | 0.000 |
| N × maturity                  | 0.233  | 0.594            | 0.056             | 0.361                  | 0.880 | 0.899 | 0.142  | 0.903 | 0.671 | 0.306             | 0.637    | 0.313 |
| N × seed                      | 0.723  | 0.213            | 0.430             | 0.677                  | 0.359 | 0.808 | 0.016  | 0.313 | 0.248 | 0.471             | 0.854    | 0.238 |
| N × source                    | 0.197  | 0.831            | 0.306             | 0.026                  | 0.353 | 0.203 | 0.828  | 0.383 | 0.346 | 0.005             | 0.015    | 0.174 |
| N × maturity × seed           | 0.341  | 0.213            | 0.776             | 0.347                  | 0.374 | 0.807 | 0.104  | 0.724 | 0.118 | 0.016             | 0.689    | 0.300 |
| N × maturity × source         | 0.989  | 0.980            | 0.651             | 0.802                  | 0.797 | 0.043 | 0.294  | 0.711 | 0.255 | 0.857             | 0.963    | 0.753 |
| N × seed × source             | 0.673  | 0.735            | 0.379             | 0.534                  | 0.638 | 0.598 | 0.344  | 0.877 | 0.679 | 0.561             | 0.517    | 0.109 |
| N × maturity × seed × source  | 0.729  | 0.909            | 0.882             | 0.747                  | 0.899 | 0.818 | 0.428  | 0.590 | 0.760 | 0.627             | 0.904    | 0.919 |
